# Supplementary material for: Chemical fingerprinting and quantitative monitoring of the doping drugs bambuterol and terbutaline in human urine samples using ATR-FTIR coupled with a PLSR chemometric tool
Source: Royal Society of Chemistry journal article supplement (doi:10.1039/c9ra10033d), 2020-01-01
Supplement: c9ra10033d1.pdf [file c9ra10033d1.pdf]

***Chemical Fingerprinting and quantitative analysis of the doping drugs bambuterol and terbutaline in human urine samples using ATR-FTIR coupled with chemometric tools.***

***Supplementary Figures***

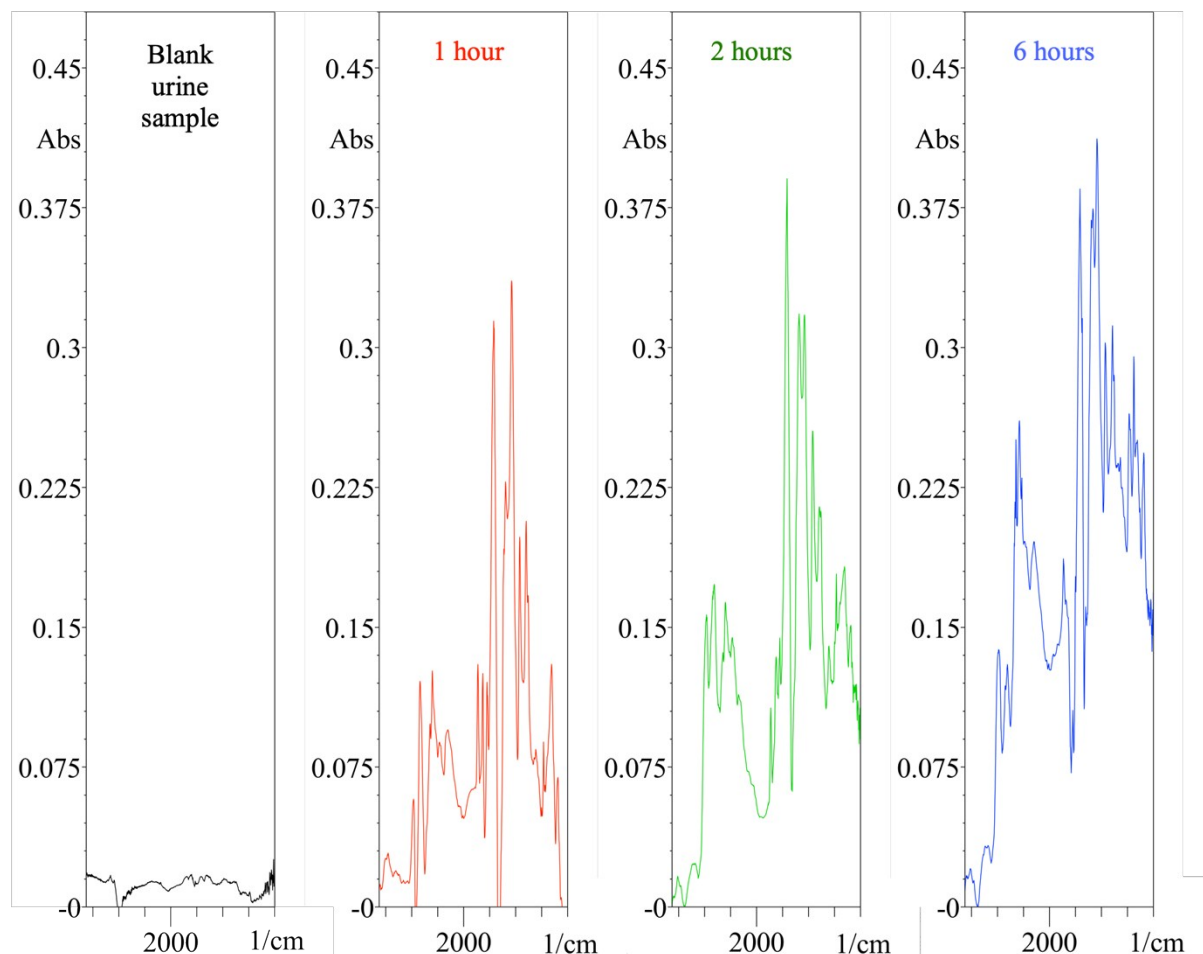

Figure (1S): Typical ATR-FTIR spectra of bank urine sample side by side to the urine samples obtained from volunteers at various times (1, 2 and 6 hours) after a single oral dose of 20 mg bambuterol tablet. All the samples were measured against urine sample background spectrum that contain all unit components of urine without the under investigation drug or its metabolites.

## Supplementary Tables

Table (1S): Characteristic groups and spectrum peaks differences between BAM and TER

| <i>Terbutaline</i>                                                                  |                                                                                                                                                                   | <i>Bambuterol</i>                                                                                                                                                          |                                                                                       |
|-------------------------------------------------------------------------------------|-------------------------------------------------------------------------------------------------------------------------------------------------------------------|----------------------------------------------------------------------------------------------------------------------------------------------------------------------------|---------------------------------------------------------------------------------------|
| 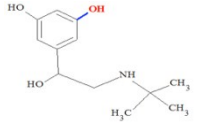   | O-H and C-O combination band at 1195.87 – 1236.46 -1342 – 1381 - 1394 $\text{cm}^{-1}$ and O-H stretching in range of 3100 – 3600 $\text{cm}^{-1}$                | Characteristic carbonyl shows C=O stretching at 1720 $\text{cm}^{-1}$                                                                                                      |    |
|    | C-O stretching at 1195.87 – 1236.46 $\text{cm}^{-1}$                                                                                                              | Hydroxyl [OH] group shows stretching in its characteristic region nearly from 3150 to 3600 $\text{cm}^{-1}$                                                                |    |
|    | Tertiary butyl $\text{CH}_3$ vibration at 1381.03 $\text{cm}^{-1}$                                                                                                | Tertiary butyl $\text{CH}_3$ vibration at 1384.8 $\text{cm}^{-1}$                                                                                                          |    |
|    | Aromatic 1,3,5-tri substituted benzene C-H out of plane at regions [700.16 – 846.75 $\text{cm}^{-1}$ ] also C-H stretching 3113.1 $\text{cm}^{-1}$                | Aromatic 1,3,5-tri substituted benzene C-H out of plane at regions [651.9 - 692.4 – 810 – 850.3 $\text{cm}^{-1}$ ] also C-H stretching 3053 – 3113.1 $\text{cm}^{-1}$      |    |
|   | Amino [NH] group shows stretching in its characteristic region nearly from 3275 to 3350 $\text{cm}^{-1}$                                                          | Amino [NH] group shows stretching in its characteristic region nearly from 3275 to 3350 $\text{cm}^{-1}$                                                                   |   |
|  | Secondary di alkyl amine C-N stretching at 1122.57 $\text{cm}^{-1}$                                                                                               | Secondary di alkyl amine C-N stretching at 1150 $\text{cm}^{-1}$                                                                                                           |  |
|  | $\text{CH}_2$ at 1467.83 $\text{cm}^{-1}$                                                                                                                         | Tertiary amine C-N stretching show peak at 1166.93 $\text{cm}^{-1}$                                                                                                        |  |
|                                                                                     |                                                                                                                                                                   | N,N-di alkyl Carbamate shows C-N stretching at 1295.3 and 1292.31 $\text{cm}^{-1}$                                                                                         |  |
|  | Aromatic 1,3,5-tri substituted benzene ring stretching at [1604.78 – 1481.33 – 1467.83 $\text{cm}^{-1}$ ] and ring out of plane pending at 730 $\text{cm}^{-1}$ ] | Aromatic 1,3,5-tri substituted benzene ring stretching at [1442.75 – 1483.26 – 1622.13 $\text{cm}^{-1}$ ] and ring out of plane pending at 692.43 - 756 $\text{cm}^{-1}$ ] |  |
